# Supplementary material for: Phylogeography of Sarmarutilus rubilio (Cypriniformes: Leuciscidae): Complex Genetic Structure, Clues to a New Cryptic Species and Further Insights into Roaches Phylogeny
Source: MDPI journal article supplement (doi:10.3390/genes13061071), 2022-06-15
Supplement: s1 [file s1]

## Supplementary Material for

### Phylogeography of *Sarmarutilus rubilio* (Cypriniformes: Leuciscidae): complex genetic structure, clues to a new cryptic species and further insights into roaches phylogeny

Gerardo Petrosino <sup>1,\*</sup>, Lorenzo Tancioni <sup>2</sup>, Martina Turani <sup>1</sup>, Arnold Rakaj <sup>2</sup>, Luca Ciuffardi <sup>3</sup>, and Anna Rita Rossi <sup>1</sup>

<sup>1</sup> Department of Biology and Biotechnology “C. Darwin”, Sapienza University of Rome, 00185 Rome, Italy; gerardo.petrosino@uniroma1.it (G.P.); annarita.rossi@uniroma1.it (A.R.R.)

<sup>2</sup> Department of Biology, University of Rome “Tor Vergata”, 00133 Rome, Italy; tancioni@uniroma2.it (L.T.); arnoldrakaj@gmail.com (A.R.)

<sup>3</sup> Center for BioNatural Studies srl, 16132 Genova, Italy; info@lucaciuffardi.it

\* Correspondence: gerardo.petrosino@uniroma1.it

**Table S1.** PCR conditions and primers for each amplified marker and PCR product length. Total volume reaction = 20 µl: 2 µl of 10x NH<sub>4</sub> Buffer, 0.6 µl of 50 mM MgCl<sub>2</sub>, 0.4 µl of dNTP mix (2.5 µM each dNTP), 0.2 µl of 100 µM of each primer, 0.14 µl of 5 Uµl<sup>-1</sup> of BIOTAQ™ DNA Polymerase (Bioline) and 10–100 ng of template DNA.

| Marker  | Primer sequence                                                                   | Reference | PCR conditions                                                                   | Gene length (bp) |
|---------|-----------------------------------------------------------------------------------|-----------|----------------------------------------------------------------------------------|------------------|
| COI     | FISHF1: 5'TCAACCAACCACAAAGACATTGGCAC3'<br>FishR2 5'-ACTTCAGGGTGACCGAAGAATCAGAA-3' | [121]     | 95°C, 2 min - 30 cycles: 94°C, 30 s; 54°C, 30 s;<br>72°C, 1 min - 72°C, 10 min.  | 624              |
| CR      | ESTFOR: 5'CATCGGTCTTGTAATCCGAAGAT3'<br>PHE1R: 5'ACATCTTCAGTGTTACGCTT3'            | [122]     | 95°C, 2 min - 30 cycles: 94°C, 30 s; 54°C, 30 s;<br>72°C, 1 min - 72°C, 10 min.  | 929-930          |
| Cyfun P | Cyp_un FLP1: 5'AAGTGGTGCATCGTGTGTG3'<br>Cyp_unFL1R: 5'CAGCCTGAACAATCAAAACAG3'     | [42]      | 94°C, 3 min - 35 cycles: 94°C, 30 s; 55°C, 30 s;<br>72°C, 1 min - 72°C, 10 min.  | 156-218*         |
| S7      | S7RPEX1F: 5'TGGCCTCTTCCTTGGCCGTC3'<br>S7RPEX2R: 5'AACTCGTCTGGCTTTTCGCC3'          | [123]     | 95°C, 3 min - 30 cycles: 95°C, 30 s; 54°C, 1 min;<br>72°C, 2 min - 72°C, 10 min. | 319-861*         |

\*total alignment including gaps

## References

121. Lieckfeldt, D.; Hett, A.K.; Ludwig, A.; Freyhof, J. Detection, Characterization and Utility of a New Highly Variable Nuclear Marker Region in Several Species of Cyprinid Fishes (Cyprinidae). *Eur. J. Wildl. Res.* **2006**, *52*, 63–65. <https://doi.org/10.1007/s10344-005-0010-6>.
122. Ward, D.R.; Zemlak T.S.; Innes B.H.; Last P.R.; Hebert, P.D.N. DNA barcoding Australia's fish species. *Philos. Trans. R. Soc. B*, **2005**, *360*, 1847–1857. <https://doi.org/10.1098/rstb.2005.1716>.

123. Gilles, A.; Lecointre, G.; Miquelis, A.; Loerstcher, M.; Chappaz, R.; Brun, G. Partial Combination Applied to Phylogeny of European Cyprinids Using the Mitochondrial Control Region. *Mol. Phylogenetics Evol.*, **2001**, *19*, 22–33. <https://doi.org/10.1006/mpev.2000.0916>.
124. Chow, S.; Hazama, K. Universal primer for S7 ribosomal protein gene intron in fish. *Mol. Ecol.*, **1998**, *7*, 1255–1256.

**Table S2.** COI Sequences retrieved from GenBank (<https://www.ncbi.nlm.nih.gov/genbank/>) and Barcode Of Life Data SYSTEM ([www.boldsystems.org](http://www.boldsystems.org), in yellow) included in the phylogenetic reconstruction.

| Species label from databases<br>(Genus <i>Rutilus</i> ) | Accession Number | Current valid species name<br>(Eschmeyer Catalogue of Fishes,<br><a href="https://www.calacademy.org/scientists/projects/eschmeyers-catalog-of-fishes">https://www.calacademy.org/scientists/projects/eschmeyers-catalog-of-fishes</a> ) | Country (basin)                  | ID site (only <i>S. rubilio</i> , see Figure 1) |
|---------------------------------------------------------|------------------|------------------------------------------------------------------------------------------------------------------------------------------------------------------------------------------------------------------------------------------|----------------------------------|-------------------------------------------------|
| <i>R. albus</i>                                         | MG806869         | <i>Leucos albus</i>                                                                                                                                                                                                                      | Albania (Drin)                   |                                                 |
| <i>R. albus</i>                                         | KJ554332         | <i>Leucos albus</i>                                                                                                                                                                                                                      | Albania (Skadar lake)            |                                                 |
| <i>R. albus</i>                                         | KJ554244         | <i>Leucos albus</i>                                                                                                                                                                                                                      | Albania (Skadar lake)            |                                                 |
| <i>R. albus</i>                                         | KJ554242         | <i>Leucos albus</i>                                                                                                                                                                                                                      | Albania (Skadar lake)            |                                                 |
| <i>R. aula</i>                                          | KJ554532         | <i>Leucos aula</i>                                                                                                                                                                                                                       | Italy (Po)                       |                                                 |
| <i>R. aula</i>                                          | KJ554171         | <i>Leucos aula</i>                                                                                                                                                                                                                       | Croatia (Zadar)                  |                                                 |
| <i>R. aula</i>                                          | HM560323         | <i>Leucos aula</i>                                                                                                                                                                                                                       | Croatia (Bacisca lake)           |                                                 |
| <i>R. aula</i>                                          | MG806870         | <i>Leucos aula</i>                                                                                                                                                                                                                       | Croatia (Zrmanja)                |                                                 |
| <i>R. basak</i>                                         | MG806871         | <i>Leucos basak</i>                                                                                                                                                                                                                      | Bosnia and Herzegovina (Neretva) |                                                 |
| <i>R. basak</i>                                         | HM560325         | <i>Leucos basak</i>                                                                                                                                                                                                                      | Bosnia and Herzegovina (Neretva) |                                                 |
| <i>R. basak</i>                                         | KJ554498         | <i>Leucos basak</i>                                                                                                                                                                                                                      | Bosnia and Herzegovina (Neretva) |                                                 |
| <i>R. basak</i>                                         | KJ554191         | <i>Leucos basak</i>                                                                                                                                                                                                                      | Bosnia and Herzegovina (Mandek)  |                                                 |
| <i>R. frisii</i>                                        | MG806872         | <i>Rutilus frisii</i>                                                                                                                                                                                                                    | Bulgaria (Rezowska)              |                                                 |
| <i>R. frisii</i>                                        | KJ554245         | <i>Rutilus frisii</i>                                                                                                                                                                                                                    | Bulgaria (Rezowska)              |                                                 |
| <i>R. frisii</i>                                        | MT756353         | <i>Rutilus frisii</i>                                                                                                                                                                                                                    | Iran (Gorgan Gulf Caspian Sea)   |                                                 |
| <i>R. frisii</i>                                        | MT756352         | <i>Rutilus frisii</i>                                                                                                                                                                                                                    | Iran (Gorgan Gulf Caspian Sea)   |                                                 |
| <i>R. heckelii</i>                                      | KJ554478         | <i>Rutilus lacustris</i>                                                                                                                                                                                                                 | Greece (Volvi lake)              |                                                 |
| <i>R. heckelii</i>                                      | KJ554441         | <i>Rutilus lacustris</i>                                                                                                                                                                                                                 | Greece (Volvi lake)              |                                                 |
| <i>R. heckelii</i>                                      | KJ554358         | <i>Rutilus lacustris</i>                                                                                                                                                                                                                 | Greece (Volvi lake)              |                                                 |
| <i>R. heckelii</i>                                      | KJ554261         | <i>Rutilus lacustris</i>                                                                                                                                                                                                                 | Greece (Volvi lake)              |                                                 |
| <i>R. kutum</i>                                         | AQM026-16        | <i>Rutilus kutum</i>                                                                                                                                                                                                                     | Iran (Mazandaran Province)       |                                                 |
| <i>R. kutum</i>                                         | AQM027-16        | <i>Rutilus kutum</i>                                                                                                                                                                                                                     | Iran (Mazandaran Province)       |                                                 |
| <i>R. kutum</i>                                         | AQM028-16        | <i>Rutilus kutum</i>                                                                                                                                                                                                                     | Iran (Mazandaran Province)       |                                                 |

| <i>R. kutum</i>      | AQM029-16 | <i>Rutilus kutum</i>        | Iran (Mazandaran Province)     |         |
|----------------------|-----------|-----------------------------|--------------------------------|---------|
| <i>R. lacustris</i>  | MT756380  | <i>Rutilus lacustris</i>    | Iran (Gorgan Gulf Caspian Sea) |         |
| <i>R. lacustris</i>  | HQ561910  | <i>Rutilus lacustris</i>    | Georgia (Rioni)                |         |
| <i>R. lacustris</i>  | HQ561909  | <i>Rutilus lacustris</i>    | Georgia (Rioni)                |         |
| <i>R. lacustris</i>  | MG806873  | <i>Rutilus lacustris</i>    | Greece (Struma)                |         |
| <i>R. meidingeri</i> | KR477255  | <i>Rutilus meidingeri</i>   | Austria (Mondsee lake)         |         |
| <i>R. meidingeri</i> | KR477254  | <i>Rutilus meidingeri</i>   | Austria (Mondsee lake)         |         |
| <i>R. meidingeri</i> | KR477253  | <i>Rutilus meidingeri</i>   | Austria (Mondsee lake)         |         |
| <i>R. meidingeri</i> | KR477099  | <i>Rutilus meidingeri</i>   | Austria (Mondsee lake)         |         |
| <i>R. ohridanus</i>  | MG806874  | <i>Leucos basak</i>         | Albania (Ohrid lake)           |         |
| <i>R. ohridanus</i>  | KJ554509  | <i>Leucos basak</i>         | Albania (Ohrid lake)           |         |
| <i>R. ohridanus</i>  | KJ554414  | <i>Leucos basak</i>         | Albania (Ohrid lake)           |         |
| <i>R. ohridanus</i>  | KJ554350  | <i>Leucos basak</i>         | Albania (Ohrid lake)           |         |
| <i>R. panosi</i>     | MG806875  | <i>Leucos panosi</i>        | Greece (Trichonis lake)        |         |
| <i>R. panosi</i>     | KJ554528  | <i>Leucos panosi</i>        | Greece (Trichonis lake)        |         |
| <i>R. panosi</i>     | KJ554495  | <i>Leucos panosi</i>        | Greece (Trichonis lake)        |         |
| <i>R. panosi</i>     | KJ554396  | <i>Leucos panosi</i>        | Greece (Trichonis lake)        |         |
| <i>R. pigus</i>      | HM560327  | <i>Rutilus pigus</i>        | Italy (Adda)                   |         |
| <i>R. pigus</i>      | HM560326  | <i>Rutilus pigus</i>        | Italy (Adda)                   |         |
| <i>R. pigus</i>      | KJ554485  | <i>Rutilus pigus</i>        | Italy (Como lake)              |         |
| <i>R. pigus</i>      | KJ554328  | <i>Rutilus pigus</i>        | Italy (Como lake)              |         |
| <i>R. prespensis</i> | KJ554482  | <i>Leucos basak</i>         | Albania (Prespa lake)          |         |
| <i>R. prespensis</i> | KJ554471  | <i>Leucos basak</i>         | Albania (Prespa lake)          |         |
| <i>R. prespensis</i> | KJ554468  | <i>Leucos basak</i>         | Albania (Prespa lake)          |         |
| <i>R. prespensis</i> | KJ554445  | <i>Leucos basak</i>         | Albania (Prespa lake)          |         |
| <i>R. rubilio</i>    | KJ554475  | <i>Sarmarutilus rubilio</i> | Italy (Arno)                   | ARN-Cas |
| <i>R. rubilio</i>    | KJ554114  | <i>Sarmarutilus rubilio</i> | Italy (Arno)                   | ARN-Cas |
| <i>R. rubilio</i>    | KJ554324  | <i>Sarmarutilus rubilio</i> | Italy (Arno)                   | ARN-Ter |
| <i>R. rubilio</i>    | KJ554212  | <i>Sarmarutilus rubilio</i> | Italy (Arno)                   | ARN-Ter |
| <i>R. rubilio</i>    | KJ554352  | <i>Sarmarutilus rubilio</i> | Italy (Tiber)                  | TIB-Ang |

|                      |          |                             |                          |         |
|----------------------|----------|-----------------------------|--------------------------|---------|
| <i>R. rubilio</i>    | KJ554250 | <i>Sarmarutilus rubilio</i> | Italy (Tiber)            | TIB-Ang |
| <i>R. rubilio</i>    | KJ554361 | <i>Sarmarutilus rubilio</i> | Italy (Tiber)            | TIB-Mon |
| <i>R. rubilio</i>    | KJ554088 | <i>Sarmarutilus rubilio</i> | Italy (Tiber)            | TIB-Mon |
| <i>R. rubilio</i>    | KJ554380 | <i>Sarmarutilus rubilio</i> | Italy (Sisto)            | SIS     |
| <i>R. rubilio</i>    | KJ554226 | <i>Sarmarutilus rubilio</i> | Italy (Sisto)            | SIS     |
| <i>R. rubilio</i>    | KJ554435 | <i>Sarmarutilus rubilio</i> | Italy (Fondi lake)       | FON     |
| <i>R. rubilio</i>    | KJ554290 | <i>Sarmarutilus rubilio</i> | Italy (Fondi lake)       | FON     |
| <i>R. rubilio</i>    | KJ554508 | <i>Sarmarutilus rubilio</i> | Italy (Volturno)         | VOL     |
| <i>R. rubilio</i>    | KJ554364 | <i>Sarmarutilus rubilio</i> | Italy (Volturno)         | VOL     |
| <i>R. rubilio</i>    | KJ554200 | <i>Sarmarutilus rubilio</i> | Italy (Volturno)         | VOL     |
| <i>R. rubilio</i>    | KJ554118 | <i>Sarmarutilus rubilio</i> | Italy (Volturno)         | VOL     |
| <i>R. rubilio</i>    | KJ554409 | <i>Sarmarutilus rubilio</i> | Italy (Crati)            | CRA     |
| <i>R. rubilio</i>    | KJ554274 | <i>Sarmarutilus rubilio</i> | Italy (Crati)            | CRA     |
| <i>R. rubilio</i>    | KJ554129 | <i>Sarmarutilus rubilio</i> | Italy (Crati)            | CRA     |
| <i>R. rutilus</i>    | KT989765 | <i>Rutilus rutilus</i>      | Russia (Plescheevo lake) |         |
| <i>R. rutilus</i>    | HQ961042 | <i>Rutilus rutilus</i>      | Czech Republic (Ohre)    |         |
| <i>R. rutilus</i>    | MW473258 | <i>Rutilus rutilus</i>      | Germany (Rhine)          |         |
| <i>R. rutilus</i>    | HM392103 | <i>Rutilus rutilus</i>      | Germany (Danube)         |         |
| <i>R. virgo</i>      | HM392106 | <i>Rutilus virgo</i>        | Germany (Danube)         |         |
| <i>R. virgo</i>      | HM392104 | <i>Rutilus virgo</i>        | Germany (Vils)           |         |
| <i>R. virgo</i>      | HM392102 | <i>Rutilus virgo</i>        | Germany (Danube)         |         |
| <i>R. virgo</i>      | MG806878 | <i>Rutilus virgo</i>        | Croatia (Sava)           |         |
| <i>R. ylikiensis</i> | MG806879 | <i>Leucos ylikiensis</i>    | Greece (Yliki lake)      |         |
| <i>R. ylikiensis</i> | KJ554524 | <i>Leucos ylikiensis</i>    | Greece (Kifissos)        |         |
| <i>R. ylikiensis</i> | KJ554516 | <i>Leucos ylikiensis</i>    | Greece (Kifissos)        |         |
| <i>R. ylikiensis</i> | KJ554316 | <i>Leucos ylikiensis</i>    | Greece (Kifissos)        |         |

**Table S3.** COI (a) and CR (b) diagnostic sites identified among the most frequent sequences of the three haplogroups found in Italian specimens. Deletions are marked with “-”.

(a) Diagnostic COI (624 bp) sites

|                        |   |   | (a) Diagnostic COI (521 bp) sites |   |   |   |   |   |   |   |   |   |   |   |   |   |   |   |   |   |   |   |   |   |   |   |   |   |   |   |
|------------------------|---|---|-----------------------------------|---|---|---|---|---|---|---|---|---|---|---|---|---|---|---|---|---|---|---|---|---|---|---|---|---|---|---|
| Position/<br>Haplotype |   |   | 1                                 | 1 | 2 | 2 | 2 | 2 | 2 | 2 | 2 | 2 | 2 | 3 | 3 | 3 | 3 | 4 | 4 | 4 | 4 | 4 | 4 | 4 | 4 | 5 | 5 | 5 | 5 | 6 |
|                        | 5 | 9 | 4                                 | 9 | 1 | 1 | 5 | 5 | 5 | 7 | 7 | 7 | 8 | 9 | 0 | 0 | 3 | 8 | 0 | 2 | 3 | 5 | 6 | 7 | 9 | 0 | 2 | 3 | 5 | 1 |
|                        | 4 | 6 | 4                                 | 8 | 6 | 9 | 0 | 2 | 6 | 0 | 6 | 9 | 5 | 4 | 3 | 9 | 0 | 4 | 8 | 9 | 5 | 3 | 2 | 7 | 5 | 4 | 2 | 4 | 5 | 2 |
| HpA01                  | G | T | C                                 | G | T | G | T | G | C | C | A | T | C | A | A | G | C | G | C | T | G | A | G | A | C | C | A | A | T | C |
| HpB01                  | G | T | C                                 | G | T | G | T | G | C | C | G | T | C | A | A | A | C | G | T | C | G | G | G | A | C | T | G | A | T | T |
| HpC01                  | A | C | T                                 | A | C | A | C | A | T | T | A | C | T | G | G | G | T | C | T | T | A | G | A | G | A | C | G | G | C | T |

(b) Diagnostic CR (930 bp) sites

| c) Diagnostic CR (500 bp) sites |                                                                       |   |   |   |   |   |   |   |   |   |   |   |   |   |   |   |   |   |   |   |   |   |   |   |   |   |   |   |   |   |   |   |   |   |   |
|---------------------------------|-----------------------------------------------------------------------|---|---|---|---|---|---|---|---|---|---|---|---|---|---|---|---|---|---|---|---|---|---|---|---|---|---|---|---|---|---|---|---|---|---|
| Position/<br>Haplotype          | 1 3 3 3 3 4 4 4 4 4 5 5 5 6 6 6 6 7 7 7 8 8 8 8 8 8 8 8 9 9 9         |   |   |   |   |   |   |   |   |   |   |   |   |   |   |   |   |   |   |   |   |   |   |   |   |   |   |   |   |   |   |   |   |   |   |
|                                 | 2 5 8 4 7 7 7 9 1 6 6 7 9 1 5 6 0 1 5 7 2 2 8 0 3 3 4 7 7 8 9 9 1 3   |   |   |   |   |   |   |   |   |   |   |   |   |   |   |   |   |   |   |   |   |   |   |   |   |   |   |   |   |   |   |   |   |   |   |
|                                 | 7 5 5 6 2 1 2 6 3 7 3 5 3 4 8 5 7 8 0 3 0 4 5 3 8 5 9 4 3 7 9 4 7 6 0 |   |   |   |   |   |   |   |   |   |   |   |   |   |   |   |   |   |   |   |   |   |   |   |   |   |   |   |   |   |   |   |   |   |   |
| HpA01                           | C                                                                     | A | G | T | C | C | G | G | T | G | T | T | A | T | G | A | C | T | T | T | C | A | T | A | G | G | G | A | G | T | G | G | T | A | C |
| HpB01                           | G                                                                     | A | A | T | C | C | G | G | A | G | C | C | A | A | G | A | T | T | T | T | T | T | T | G | A | A | G | A | G | T | A | G | T | A | C |
| HpC01                           | C                                                                     | G | A | C | T | A | T | T | A | T | T | T | G | T | A | T | T | C | C | C | T | T | A | A | A | A | A | G | A | G | A | A | - | G | T |

**Table S4.** Diagnostic fragment of nuclear marker Cyfun P in Italian specimens subset. Individuals with specific VAR sequences are highlighted in green, variable sites/indels in yellow; mtDNA lineage of each specimen is also reported. Missing data are marked with N, deletions with -.

|         | CyfunP<br>GenBank<br>Accession<br>Number | MtDNA<br>haplogroup | 1<br>4<br>6 | 1<br>4<br>7 | 1<br>4<br>8 | 1<br>4<br>9 | 1<br>5<br>0 | 1<br>5<br>1 | 1<br>5<br>2 | 1<br>5<br>3 | 1<br>5<br>4 | 1<br>5<br>5 | 1<br>5<br>6 | 1<br>5<br>7 | 1<br>5<br>8 | 1<br>5<br>9 | 1<br>6<br>0 | 1<br>6<br>1 | 1<br>6<br>2 | 1<br>6<br>3 | 1<br>6<br>4 | 1<br>6<br>5 | 1<br>6<br>6 | 1<br>6<br>7 | 1<br>6<br>8 | 1<br>6<br>9 | 1<br>7<br>0 | 1<br>7<br>1 | 1<br>7<br>2 | 1<br>7<br>3 | 1<br>7<br>4 | 1<br>7<br>5 | 1<br>7<br>6 | 1<br>7<br>7 | 1<br>7<br>8 | 1<br>7<br>9 | 1<br>8<br>0 | 1<br>8<br>1 | 1<br>8<br>2 | 1<br>8<br>3 | 1<br>8<br>4 | 1<br>8<br>5 | 1<br>8<br>6 | 1<br>8<br>7 | 1<br>8<br>8 | 1<br>8<br>9 | 1<br>9<br>0 | 1<br>9<br>1 | 1<br>9<br>2 |   |  |
|---------|------------------------------------------|---------------------|-------------|-------------|-------------|-------------|-------------|-------------|-------------|-------------|-------------|-------------|-------------|-------------|-------------|-------------|-------------|-------------|-------------|-------------|-------------|-------------|-------------|-------------|-------------|-------------|-------------|-------------|-------------|-------------|-------------|-------------|-------------|-------------|-------------|-------------|-------------|-------------|-------------|-------------|-------------|-------------|-------------|-------------|-------------|-------------|-------------|-------------|-------------|---|--|
| VAR1_46 | OM966266                                 | C                   | A           | A           | C           | A           | A           | A           | A           | A           | A           | C           | A           | C           | A           | R           | A           | A           | A           | -           | -           | -           | A           | A           | A           | T           | A           | A           | A           | A           | G           | G           | A           | -           | -           | -           | -           | -           | -           | -           | -           | -           | -           | -           | -           | -           | -           | -           | -           |   |  |
| VAR1_49 | OM966267                                 | C                   | A           | A           | C           | A           | W           | A           | A           | A           | A           | C           | A           | C           | A           | N           | A           | A           | A           | -           | -           | -           | A           | A           | A           | T           | A           | A           | A           | A           | G           | G           | A           | -           | -           | -           | -           | -           | -           | -           | -           | -           | -           | -           | -           | -           | -           | -           | -           |   |  |
| VAR2_02 | OM966268                                 | A                   | A           | A           | C           | A           | A           | A           | A           | A           | A           | C           | A           | C           | A           | G           | A           | A           | A           | -           | -           | -           | A           | A           | A           | T           | A           | A           | A           | A           | G           | G           | A           | -           | -           | -           | -           | -           | -           | -           | -           | -           | -           | -           | -           | -           | -           | -           | -           |   |  |
| VAR2_09 | OM966269                                 | C                   | A           | A           | C           | A           | A           | A           | A           | A           | A           | C           | A           | C           | A           | N           | A           | A           | A           | -           | -           | -           | A           | A           | A           | T           | A           | A           | A           | A           | G           | G           | A           | -           | -           | -           | -           | -           | -           | -           | -           | -           | -           | -           | -           | -           | -           | -           | -           |   |  |
| VAR2_11 | OM966270                                 | C                   | A           | A           | C           | A           | A           | A           | A           | A           | A           | C           | A           | N           | N           | N           | N           | N           | N           | -           | -           | -           | N           | N           | N           | N           | N           | N           | N           | N           | N           | N           | N           | N           | N           | N           | N           | N           | N           | N           | N           | N           | N           | N           | N           | N           | N           | N           | N           |   |  |
| VAR2_25 | OM966271                                 | C                   | A           | A           | C           | A           | A           | A           | A           | A           | A           | C           | A           | C           | A           | N           | A           | A           | A           | -           | -           | -           | A           | A           | A           | T           | A           | A           | A           | A           | G           | G           | A           | -           | -           | -           | -           | -           | -           | -           | -           | -           | -           | -           | -           | -           | -           | -           | -           |   |  |
| VAR2_32 | OM966272                                 | C                   | A           | A           | C           | A           | W           | A           | A           | A           | A           | C           | A           | C           | A           | N           | A           | A           | A           | -           | -           | -           | A           | A           | A           | T           | A           | A           | A           | A           | G           | G           | A           | -           | -           | -           | -           | -           | -           | -           | -           | -           | -           | -           | -           | -           | -           | -           | -           | - |  |
| VAR1_33 | OM966273                                 | A                   | T           | A           | A           | A           | A           | A           | A           | A           | T           | A           | A           | A           | A           | N           | T           | A           | A           | A           | A           | T           | A           | A           | A           | T           | A           | A           | A           | N           | N           | N           | N           | N           | N           | N           | N           | N           | N           | N           | N           | N           | N           | N           | N           | N           | N           | N           | N           | N |  |
| VAR1_43 | OM966274                                 | A                   | T           | A           | A           | A           | W           | A           | A           | A           | T           | A           | A           | A           | A           | T           | A           | A           | A           | A           | A           | N           | N           | N           | N           | N           | N           | N           | N           | N           | N           | N           | N           | N           | N           | N           | N           | N           | N           | N           | N           | N           | N           | N           | N           | N           | N           | N           | N           | N |  |
| VAR2_04 | OM966275                                 | C                   | T           | A           | A           | A           | A           | A           | A           | A           | T           | A           | A           | A           | A           | T           | A           | A           | A           | A           | T           | A           | A           | A           | T           | A           | A           | A           | N           | N           | N           | N           | N           | N           | N           | N           | N           | N           | N           | N           | N           | N           | N           | N           | N           | N           | N           | N           | N           | N |  |
| VAR2_05 | OM966276                                 | C                   | T           | A           | A           | A           | A           | A           | A           | A           | T           | A           | A           | A           | A           | T           | A           | A           | A           | A           | T           | A           | A           | A           | T           | A           | A           | A           | A           | G           | G           | A           | A           | G           | T           | T           | T           | T           | C           |             |             |             |             |             |             |             |             |             |             |   |  |
| VAR2_06 | OM966277                                 | C                   | T           | A           | A           | A           | A           | A           | A           | A           | T           | A           | A           | A           | A           | T           | A           | A           | A           | A           | T           | A           | A           | A           | T           | A           | A           | A           | A           | G           | G           | A           | A           | G           | T           | T           | T           | T           | C           |             |             |             |             |             |             |             |             |             |             |   |  |
| VAR2_28 | OM966278                                 | A                   | T           | A           | A           | A           | A           | A           | A           | A           | T           | A           | A           | A           | A           | T           | A           | A           | A           | A           | T           | A           | A           | A           | T           | A           | A           | A           | A           | G           | G           | A           | A           | G           | T           | T           | T           | T           | C           |             |             |             |             |             |             |             |             |             |             |   |  |
| TIB1_26 | OM966279                                 | A                   | T           | A           | A           | A           | T           | A           | A           | A           | T           | A           | A           | A           | A           | T           | A           | A           | A           | A           | T           | A           | A           | A           | T           | A           | A           | A           | N           | N           | N           | N           | N           | N           | N           | N           | N           | N           | N           | N           | N           | N           | N           | N           | N           | N           | N           | N           | N           | N |  |
| SCR_01  | OM966280                                 | A                   | T           | A           | A           | A           | A           | A           | A           | A           | T           | A           | A           | A           | A           | T           | A           | A           | A           | A           | T           | A           | A           | A           | T           | A           | A           | A           | T           | A           | A           | A           | G           | G           | A           | A           | G           | T           | T           | T           | T           | C           |             |             |             |             |             |             |             |   |  |
| SCR_02  | OM966281                                 | A                   | T           | A           | A           | A           | A           | A           | A           | A           | T           | A           | A           | A           | A           | T           | A           | A           | A           | A           | T           | A           | A           | A           | T           | A           | A           | A           | T           | A           | A           | A           | G           | G           | A           | A           | G           | T           | T           | T           | T           | C           |             |             |             |             |             |             |             |   |  |

**Table S5.** Inter- (below the diagonal) and intra-haplogroup (diagonal, in grey) genetic mean distances (CR); pairwise  $\Phi_{ST}$  between CR haplogroups (above the diagonal).

|   | A                       | B                       | C                       |
|---|-------------------------|-------------------------|-------------------------|
| A | 0.0009 ( $\pm 0.0005$ ) | 0.94***                 | 0.97***                 |
| B | 0.0151 ( $\pm 0.0040$ ) | 0.0013 ( $\pm 0.0005$ ) | 0.96***                 |
| C | 0.0325 ( $\pm 0.0062$ ) | 0.0291 ( $\pm 0.0058$ ) | 0.0005 ( $\pm 0.0005$ ) |



**Table S6.** Population  $\Phi_{ST}$  (CR) considering all the populations as they are (a) and splitting individuals by haplogroup for each one (b). Significance thresholds: \* =  $P < 0.05$ ; \*\* =  $P < 0.01$ ; \*\*\* =  $P < 0.001$ .

(a)

|       |      | Haplogroup A/C |         | Haplogroup A |         |         |         |         |         | Haplogroup A/B |         | Haplogroup B |     |
|-------|------|----------------|---------|--------------|---------|---------|---------|---------|---------|----------------|---------|--------------|-----|
|       |      | VAR1           | VAR2    | TRO          | FOR     | ARR     | TIB1    | TIB2    | GAR     | SCR            | NOC     | SET          | SPU |
| HpA/C | VAR1 | -              |         |              |         |         |         |         |         |                |         |              |     |
|       | VAR2 | -0.05          | -       |              |         |         |         |         |         |                |         |              |     |
| HpA   | TRO  | 0.29           | 0.3     | -            |         |         |         |         |         |                |         |              |     |
|       | FOR  | 0.28           | 0.33    | 0.05         | -       |         |         |         |         |                |         |              |     |
|       | ARR  | 0.31***        | 0.35    | 0.68***      | 0.64*** | -       |         |         |         |                |         |              |     |
|       | TIB1 | 0.38***        | 0.43*** | 0.13         | 0.13    | 0.45*** | -       |         |         |                |         |              |     |
|       | TIB2 | 0.06           | 0.16    | 0.20         | 0.19    | 0.47    | 0.13    | -       |         |                |         |              |     |
|       | GAR  | 0.33           | 0.38    | 0.07         | 0.08    | 0.61*** | 0.15*** | 0.01    | -       |                |         |              |     |
| HpA/B | SCR  | 0.32***        | 0.38**  | 0.18         | 0.17    | 0.36*** | 0.21*** | 0.01    | 0.11    | -              |         |              |     |
|       | NOC  | 0.09           | 0.16    | 0.42***      | 0.38*** | 0.31*** | 0.41*** | 0.01    | 0.36*** | 0.12           | -       |              |     |
| HpB   | SET  | 0.65***        | 0.58*** | 0.98***      | 0.97*** | 0.96*** | 0.95*** | 0.96*** | 0.97*** | 0.90***        | 0.87*** | -            |     |
|       | SPU  | 0.51***        | 0.47*** | 0.98***      | 0.96*** | 0.95*** | 0.95*** | 0.95    | 0.97*** | 0.88***        | 0.79*** | 0.12         | -   |

(b)

|     |        | Haplogroup C |         | Haplogroup A |         |         |         |         |         |         |         |         |         | Haplogroup B |      |       |       |
|-----|--------|--------------|---------|--------------|---------|---------|---------|---------|---------|---------|---------|---------|---------|--------------|------|-------|-------|
|     |        | VAR1_C       | VAR2_C  | VAR1_A       | VAR2_A  | TRO     | FOR     | ARR     | TIB1    | TIB2    | SCR_A   | GAR     | NOC_A   | SET          | SPU  | SCR_B | NOC_B |
| HpC | VAR1_C | -            |         |              |         |         |         |         |         |         |         |         |         |              |      |       |       |
|     | VAR2_C | -0.07        | -       |              |         |         |         |         |         |         |         |         |         |              |      |       |       |
| HpA | VAR1_A | 0.99         | 0.99*** | -            |         |         |         |         |         |         |         |         |         |              |      |       |       |
|     | VAR2_A | 0.99         | 0.99*** | -0.03        | -       |         |         |         |         |         |         |         |         |              |      |       |       |
|     | TRO    | 0.99***      | 0.99*** | -0.04        | 0.01    | -       |         |         |         |         |         |         |         |              |      |       |       |
|     | FOR    | 0.99         | 0.99*** | 0.02         | 0.04    | 0.05    | -       |         |         |         |         |         |         |              |      |       |       |
|     | ARR    | 0.97***      | 0.98*** | 0.63         | 0.63*** | 0.68*** | 0.64*** | -       |         |         |         |         |         |              |      |       |       |
|     | TIB1   | 0.97***      | 0.98*** | 0.09         | 0.10    | 0.13    | 0.13    | 0.45*** | -       |         |         |         |         |              |      |       |       |
|     | TIB2   | 0.97         | 0.98    | 0.22         | 0.18    | 0.20    | 0.19    | 0.47    | 0.13    | -       |         |         |         |              |      |       |       |
|     | SCR_A  | 0.97***      | 0.97*** | 0.23         | 0.19    | 0.28**  | 0.27**  | 0.49*** | 0.28*** | 0.09    | -       |         |         |              |      |       |       |
|     | GAR    | 0.99***      | 0.99**  | 0.03         | 0.03    | 0.07    | 0.08*   | 0.61*** | 0.15*** | 0.01    | 0.17    | -       |         |              |      |       |       |
|     | NOC_A  | 0.99         | 0.99*** | 1.00***      | 0.89    | 0.92*** | 0.84*** | 0.64*** | 0.60*** | 0.55    | 0.35    | 0.67    | -       |              |      |       |       |
| HpB | SET    | 0.98***      | 0.98*** | 0.97***      | 0.97*** | 0.98*** | 0.97*** | 0.96*** | 0.95*** | 0.96*** | 0.94*** | 0.97*** | 0.97*** | -            |      |       |       |
|     | SPU    | 0.98         | 0.98*** | 0.98***      | 0.98*** | 0.98*** | 0.98*** | 0.95*** | 0.95*** | 0.95    | 0.93*** | 0.97*** | 0.98    | 0.12         | -    |       |       |
|     | SCR_B  | 0.98         | 0.98    | 1.00         | 0.99    | 0.99    | 0.98    | 0.94    | 0.95    | 0.94    | 0.93    | 0.98    | 1.00    | 0.89         | 0.87 | -     |       |
|     | NOC_B  | 0.98         | 0.98    | 1.00         | 0.99    | 0.99    | 0.98    | 0.94    | 0.95    | 0.94    | 0.93    | 0.98    | 1.00    | 0.92         | 0.91 | 1.00  | -     |

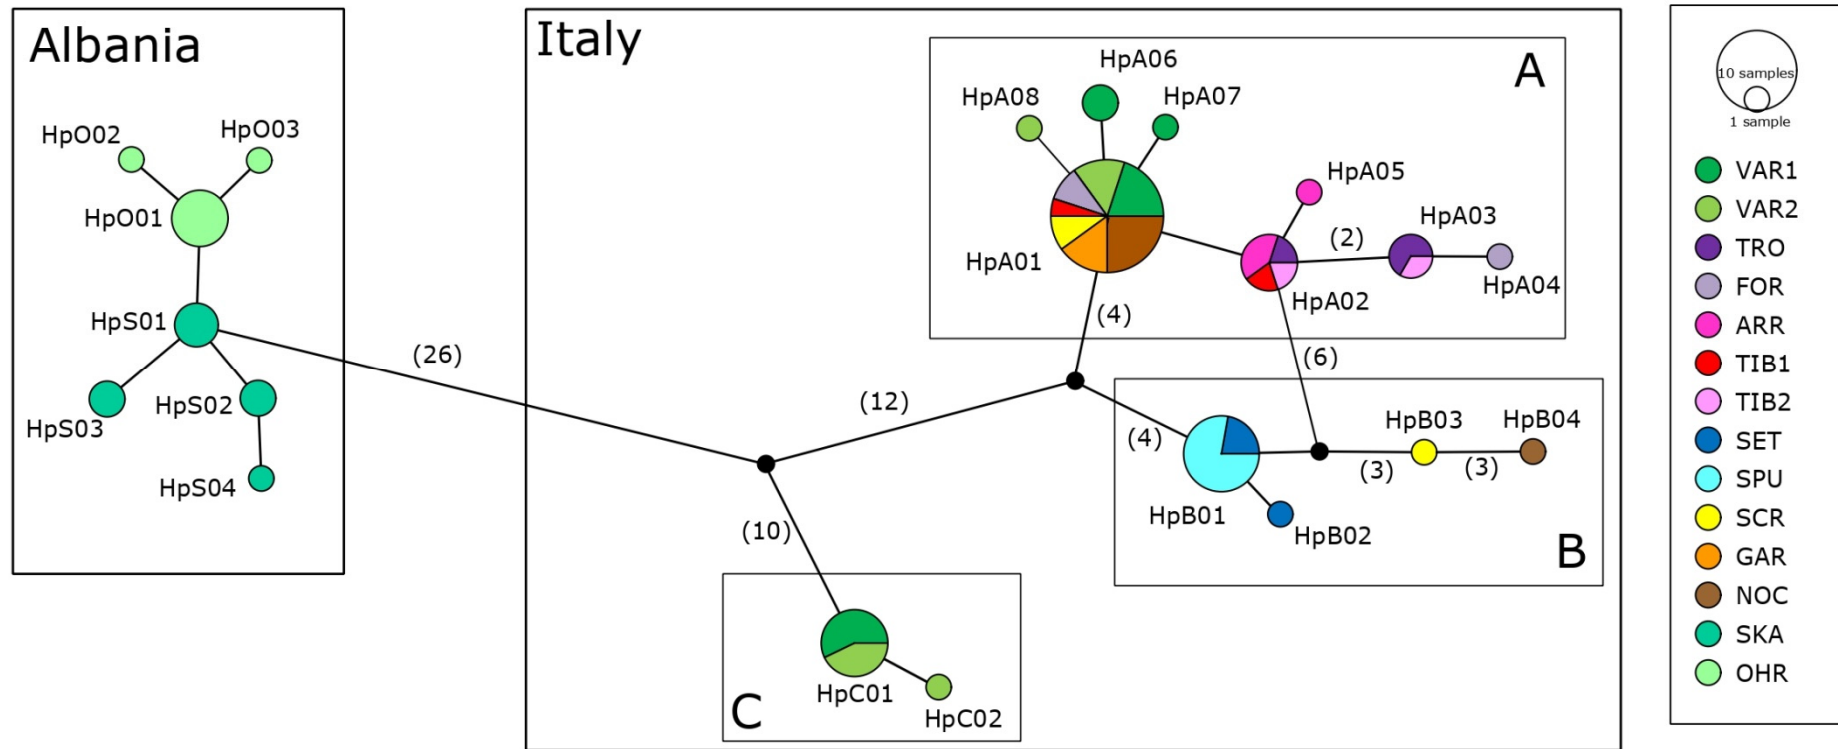

**Figure S1.** Haplotype network based on COI sequences obtained in this study. Each circle corresponds to one haplotype and its dimension is proportional to the haplotype frequency. The number of nucleotide substitutions between haplotypes is indicated in parenthesis. Population abbreviations refer to Table 1. Letters (A, B, C) and boxes refer to *S. rubilio* haplogroups as indicated in Figure 2.

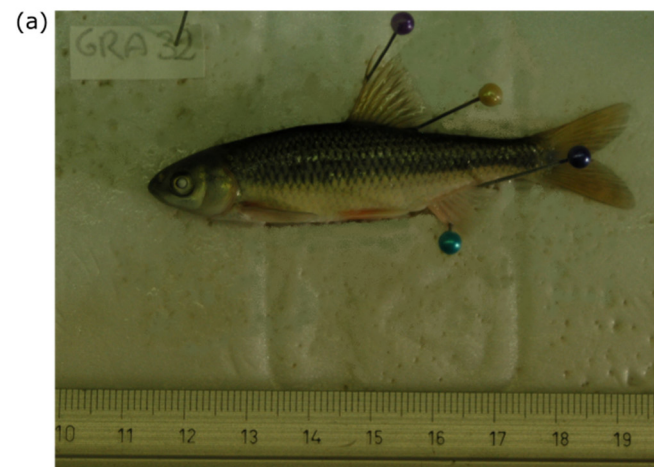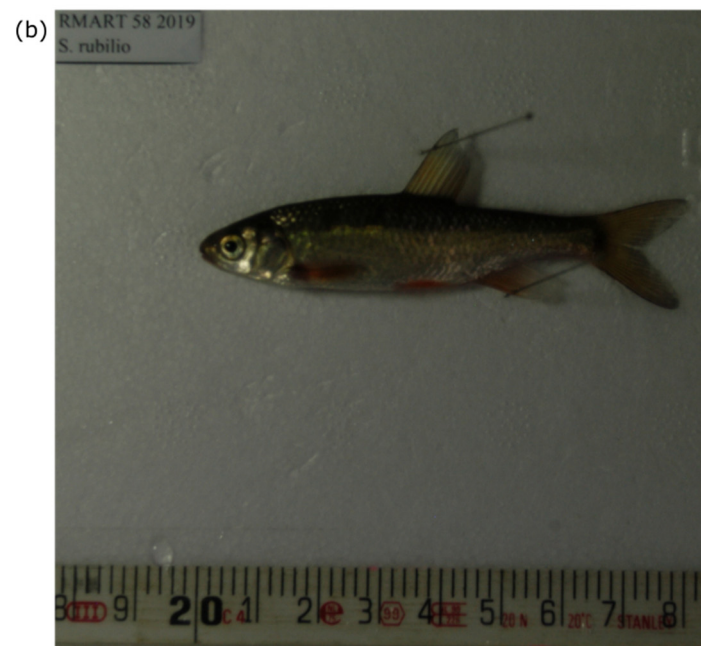

**Figure S2.** Specimens with mtDNA and Cyfun P belonging to lineage C (a) and lineage A (b).

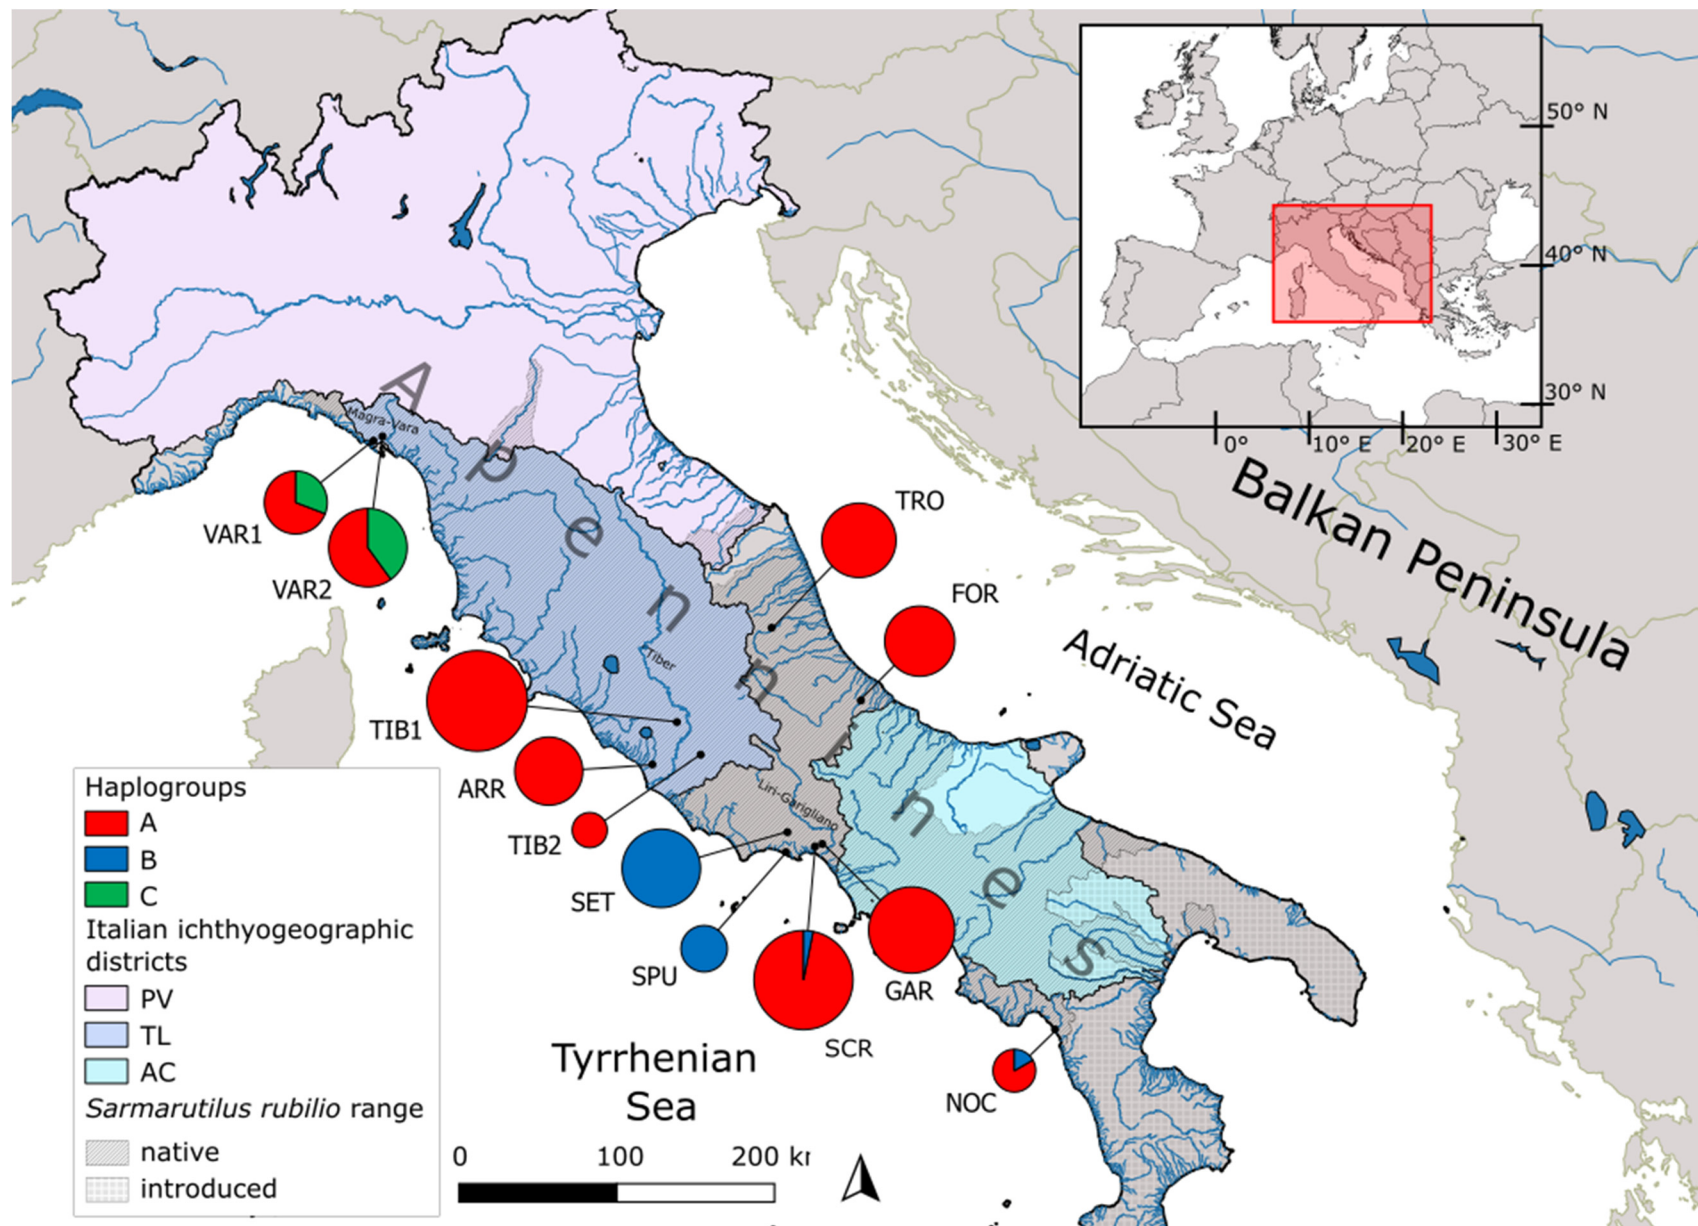

**Figure S3.** Spatial haplogroups distribution in *S. rubilio*, based on 208 Italian CR sequences.

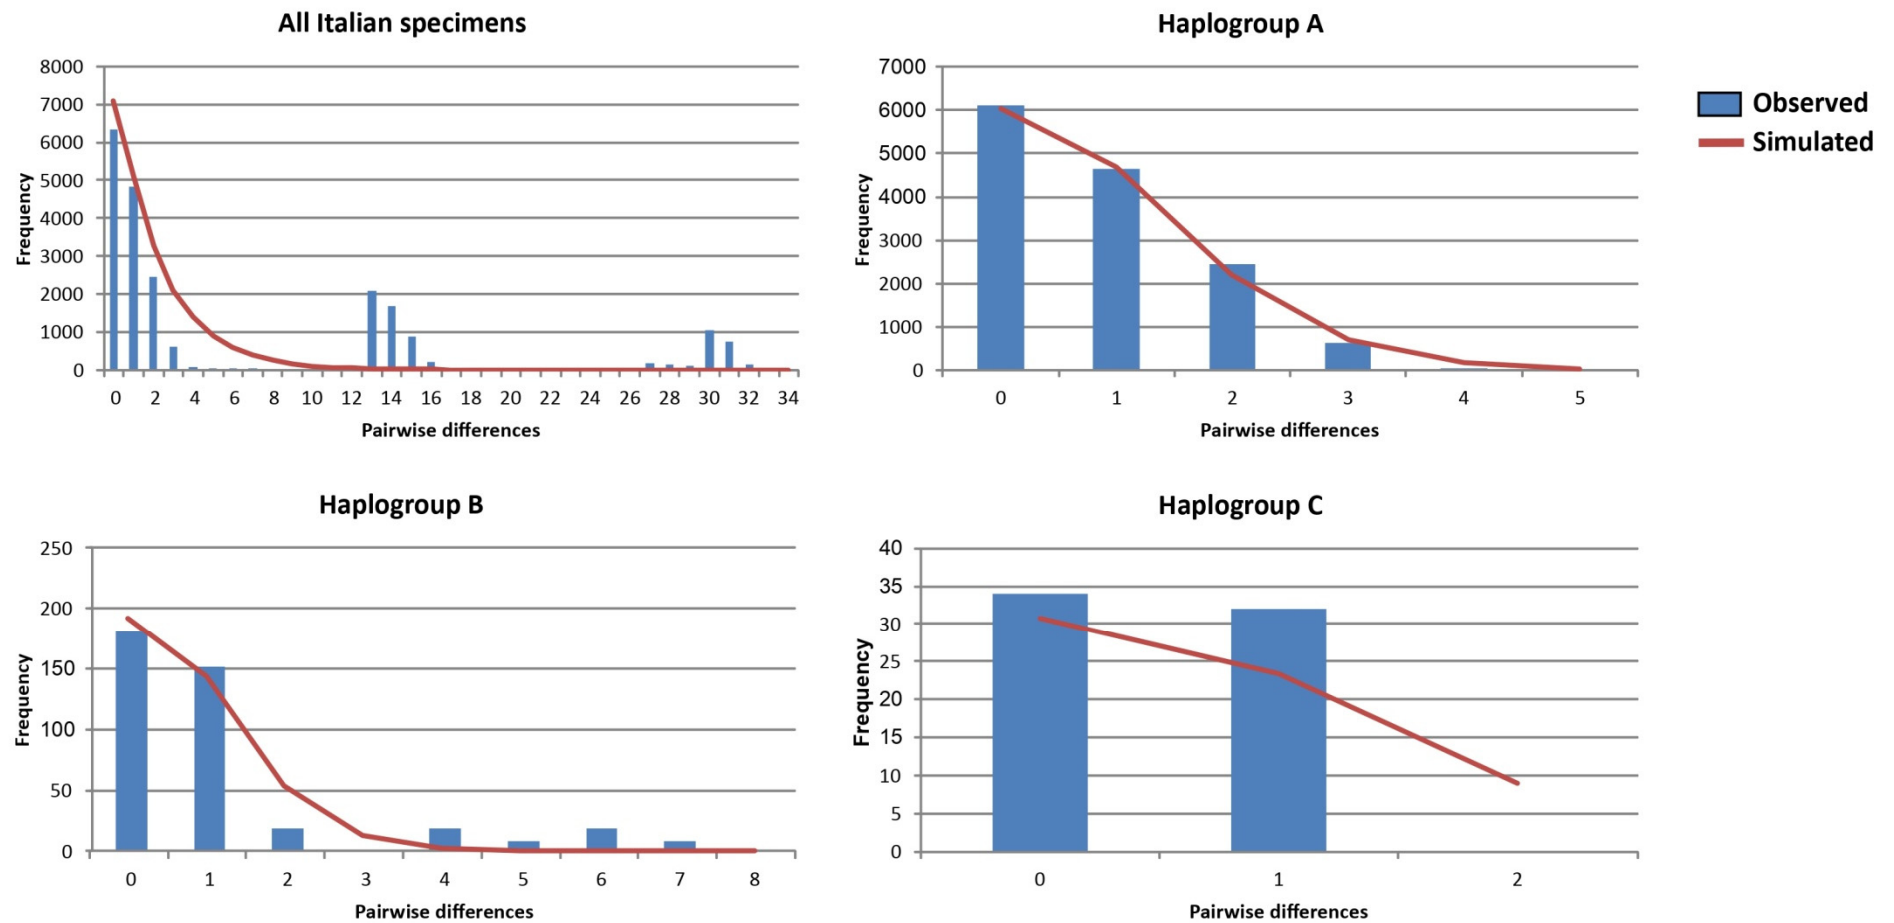

**Figure S4.** Observed mismatch distributions (bars) and expected mismatch distributions under the sudden expansion model (solid line) of CR sequences.
